# Supplementary material for: Comparative Transcriptomic Profiling and Gene Expression for Myxomatous Mitral Valve Disease in the Dog and Human
Source: MDPI journal article supplement (doi:10.3390/vetsci4030034), 2017-07-17
Supplement: s1 [file s1]

# Supplementary Materials: Comparative Transcriptomic Profiling and Gene Expression for Myxomatous Mitral Valve Disease in the Dog and Human

Greg Markby, Kim M. Summers, Vicky E. MacRae and Brendan M. Corcoran \*

**Table 1.** Comparison of gene fold changes in human MMVD (Thalji et al 2015 [2]; 2602 differentially expressed genes) with the 591 genes reported in the dog by Lu et al 2015 [1]. Both studies used the same FDR and fold settings, but Lu et al also use signal intensity to derive a much smaller gene set from an original set of 5397 differentially expressed genes. Only 109 differentially expressed genes were reported in both data sets of which 51 showed the same direction of fold change (+ or -) and 58 had the opposite fold change. The data illustrates that while there are similarities, there are also clear difference between human and canine MMVD the transcriptomic level.

|                                                          | Lu et al<br>2015<br>Dog<br>Fold<br>Change | Thaji et al<br>2015<br>Human<br>Fold<br>Change |
|----------------------------------------------------------|-------------------------------------------|------------------------------------------------|
| Gene Name                                                |                                           |                                                |
| Acyl-CoA synthetase long-chain family member 5           | 2.09                                      | -2.587                                         |
| ADAMTS19                                                 | -5.27                                     | 1.76                                           |
| Activating transcription factor 7                        | -2.104                                    | -5.16                                          |
| Angiopoietin 1                                           | 2.29                                      | -1.46                                          |
| Aryl hydrocarbon receptor nuclear translocator-like 2    | 1.57                                      | 1.808                                          |
| ATPase, Ca++ transporting, cardiac muscle, slow twitch 2 | -5.22                                     | -3.77                                          |
| ATPase, class V, type 10A                                | -4.913                                    | -3.61                                          |
| ATPase, Na+/K+ transporting, alpha 3 polypeptide         | -12.988                                   | -3.53                                          |
| Autism susceptibility candidate 2                        | 1.588                                     | -3.53                                          |
| B-cell CLL/lymphoma 6, member B                          | -2.066                                    | -3.32                                          |
| B-cell linker                                            | 1.55                                      | 3.206                                          |
| Bromodomain adjacent to zinc finger domain, 2A           | -1.562                                    | -3.24                                          |
| Calpain, small subunit 1                                 | -13.422                                   | -3.22                                          |
| Carbohydrate (chondroitin 4) sulfotransferase 11         | 2.17                                      | -1.631                                         |
| Carbonyl reductase 1                                     | 1.872                                     | -3.17                                          |
| Casein kinase 2, beta polypeptide                        | -1.757                                    | -3.09                                          |
| Caspase 8, apoptosis-related cysteine peptidase          | 3.98                                      | 1.844                                          |
| Caspase recruitment domain family, member 6              | 1.73                                      | -1.832                                         |
| Cat eye syndrome chromosome region, candidate 1          | 1.73                                      | -1.684                                         |
| CDKN2A interacting protein                               | 1.51                                      | 3.624                                          |
| Cell growth regulator with EF-hand domain 1              | 3.55                                      | 1.636                                          |
| Chemokine ligand 14                                      | 2.13                                      | -6.419                                         |
| Chemokine ligand 5                                       | 2.39                                      | -2.706                                         |
| Chemokine receptor 1                                     | 2.62                                      | 7.475                                          |
| Coagulation factor C homolog, cochlin                    | 2.34                                      | -1.631                                         |
| Complement factor I                                      | 2.79                                      | 2.479                                          |
| Cold shock domain protein A                              | -2.85                                     | -1.636                                         |
| Cyclin-dependent kinase inhibitor 1A                     | 2.84                                      | -1.952                                         |
| Cytochrome P450, family 4, subfamily B, polypeptide 1    | 3.51                                      | -30.142                                        |
| Destrin                                                  | 2.9                                       | -2.401                                         |

|                                                               |        |          |
|---------------------------------------------------------------|--------|----------|
| EPH receptor A3                                               | 2.31   | 1.671    |
| Eukaryotic translation initiation factor 1 (EIF1)             | -2.49  | -4.47    |
| Extracellular matrix protein 1                                | -2.47  | 3.148    |
| Family with sequence similarity 171, member A1                | -2.47  | 1.88     |
| FAT tumor suppressor homolog 4 (Drosophila)                   | -2.44  | 1.788    |
| Fc fragment of IgG, high affinity Ia, receptor, CD64          | 1.53   | 3.11     |
| FRAS1 related extracellular matrix 1                          | -2.42  | 2.034    |
| Fraser syndrome 1                                             | -2.42  | 2.322    |
| Frizzled-related protein                                      | 3.19   | 1.719    |
| Fucosidase, alpha-L- 2, plasma                                | 3.68   | 1.668    |
| G protein-coupled receptor 126                                | 2.2    | -2.815   |
| GABA(A) receptor-associated protein like 1                    | 3.15   | -2.815   |
| General transcription factor IIA, 2, 12kDa                    | 2.27   | 2.891    |
| HIG1 domain family member 1A-like                             | -1.677 | 2.29     |
| Homeodomain interacting protein kinase 2                      | -2.33  | -3.512   |
| Hydroxysteroid dehydrogenase 11                               | 2.2    | 2.497    |
| Hypoxia inducible factor 3, alpha subunit                     | -2.32  | -1.508   |
| Intraflagellar transport 172 homolog (Chlamydomonas)          | -2.28  | 1.698    |
| Janus kinase 2                                                | 2.24   | -3.243   |
| KIAA0430 ortholog                                             | -2.27  | 1.601    |
| LIM domain only 2 (rhombotin-like 1)                          | 2.09   | -2.283   |
| Lysophosphatidylcholine acyltransferase 4                     | -2.22  | 1.564    |
| Mastermind-like domain containing 1                           | -2.22  | 1.818    |
| Matrix metalloproteinase 16                                   | -2.22  | 4.045    |
| Musculoskeletal, embryonic nuclear protein 1                  | 2.2    | -208.066 |
| Myotubularin related protein 11                               | -2.13  | 1.918    |
| Myosin heavy chain 11                                         | 2.71   | -33.342  |
| Nucleoporin                                                   | 1.6    | -1.904   |
| Neuron navigator 2                                            | -2.12  | -2.488   |
| Neuronal PAS domain protein 2                                 | -2.12  | -2.295   |
| Nidogen 1                                                     | -2.2   | -2.627   |
| Nuclear factor of activated T-cells, calcineurin-dependent 1  | -2.11  | 1.6      |
| Odd-skipped related 1 (Drosophila)                            | 2.09   | 3.509    |
| Pallidin homolog (mouse)                                      | 5.39   | -2.091   |
| Period homolog 2 (Drosophila)                                 | -2.08  | 1.52     |
| Phosphoglucomutase 2                                          | 2.13   | 1.696    |
| Phosphoinositide-3-kinase adaptor protein 1                   | 2.9    | -2.096   |
| Phospholipase A2, group IVA                                   | 2.27   | 1.863    |
| Phospholipase C-like 1                                        | 2.17   | 1.619    |
| Phosphoinositide-3-kinase, class 2, beta polypeptide          | -2.08  | 1.964    |
| Pleckstrin                                                    | 3.36   | 2.597    |
| Plexin C1                                                     | 2.14   | 1.92     |
| Plexin domain containing 1                                    | 2.07   | 4.113    |
| Potassium voltage-gated channel, KQT-like subfamily, member 5 | -2.06  | -6.398   |
| Procollagen C-endopeptidase enhancer 2                        | 2.58   | 1.555    |
| Programmed cell death 1 ligand 2                              | 1.73   | 1.925    |
| Proline-rich protein 3-like                                   | -2.04  | 1.793    |
| Prostaglandin-endoperoxide synthase 2                         | 2.34   | -20.874  |
| Protein phosphatase 1, regulatory subunit 12B                 | -2.01  | -15.561  |
| Protein tyrosine phosphatase, non-receptor type 14            | -2.01  | -8.842   |
| Protocadherin beta 6                                          | -2.01  | 2.575    |
| Purinergic receptor P2X, ligand-gated ion channel, 7          | 1.55   | 1.54     |

|                                                                      |       |         |
|----------------------------------------------------------------------|-------|---------|
| Ras interacting protein 1                                            | -2.01 | -2.561  |
| Receptor (G protein-coupled) activity modifying protein 2            | -2    | -2.86   |
| Ras-like protein family member 11A-like                              | 3.66  | -4.274  |
| Regulator of G-protein signaling 2                                   | 3.35  | -2.68   |
| Retinoic acid receptor responder                                     | 2.48  | -2.108  |
| RNA binding protein with multiple splicing 2                         | -1.98 | -4.83   |
| S100 calcium binding protein A4                                      | 2.94  | 1.921   |
| Serine/threonine kinase 17b                                          | 2.34  | -3.616  |
| Serpin peptidase inhibitor, clade E member 2                         | 2.36  | 2.149   |
| Splicing factor 3a, subunit 1                                        | -1.74 | -1.502  |
| Sodium channel, voltage-gated, type I, beta subunit                  | 2.14  | 1.522   |
| Solute carrier family 4 (sodium bicarbonate cotransporter), member 4 | -1.78 | -10.816 |
| SRY (sex determining region Y)-box 9                                 | -1.74 | 1.59    |
| Superoxide dismutase 2, mitochondrial                                | 2.27  | -2.138  |
| Synaptotagmin XVII                                                   | -1.72 | 3.535   |
| Syntrophin, beta 1                                                   | -1.7  | 1.767   |
| Tenascin XB                                                          | -1.7  | 2.145   |
| TAF9 RNA polymerase II, TATA box binding protein-associated factor   | 1.57  | -1.54   |
| Tensin like C1 domain containing phosphatase                         | -1.69 | -1.785  |
| Toll-like receptor 1                                                 | 3.12  | 1.542   |
| Transgelin, smooth muscle protein 22- $\alpha$                       | 2.02  | -5.957  |
| Translocation associated membrane protein 2                          | -1.65 | 2.462   |
| Ubiquitin-conjugating enzyme E2 N-like                               | -1.56 | -1.88   |
| Zinc finger, MIZ-type containing 1                                   | -1.51 | 1.558   |

**Table 2.** Examples of fold change for a selection of genes in human and canine MMVD, illustrating similar and dissimilar changes in both species. 0 = no report of gene change. The genes selected represent signalling pathways involved in cell differentiation, endothelial-to-mesenchymal transition, extra-cellular matrix and inflammation. Of particular note are the differences in genes associated with myofibroblast activation.

| Gene Name                     | Function                                                   | Human<br>(Thalji et al 2015) [2]<br>Fold Change | Dog<br>(Lu et al 2015) [1]<br>Fold Change |
|-------------------------------|------------------------------------------------------------|-------------------------------------------------|-------------------------------------------|
| ACTA2; $\alpha$ SMA           | Marker of myofibroblast formation                          | -3.945                                          | 10.66                                     |
| ACTG2                         | smooth muscle actin found in enteric tissues               | -99.8                                           | 15.35                                     |
| IL-18                         | Proinflammatory cytokine                                   | 0                                               | 6.92                                      |
| IL-6                          | Pro-inflammatory cytokine and an anti-inflammatory myokine | -16.9                                           | 7.86                                      |
| IL-6R                         | Interleukin-6 receptor                                     | -2.39                                           | 0                                         |
| MYH-11; Myosin heavy chain 11 | A heavy smooth muscle myosin                               | -33.3                                           | 4.93                                      |
| CDH5; VE-cadherin             | Calcium dependent cell adhesion molecule                   | -2.442                                          | -2.559                                    |
| TLR4                          | Pattern recognition receptor                               | 0                                               | 2.35                                      |
| Nid1; Nidogen 1               | Basement membrane                                          | -2.627                                          | -3.08                                     |
| Notch1                        | Developmental signalling                                   | 0                                               | -2.33                                     |
| Lama2; Laminin 2              | Basement membrane                                          | 0                                               | -5.15                                     |
| CTSS; CathepsinS              | Lysosomal enzyme and elastase                              | 0                                               | 2.2                                       |

|                      |                                            |        |       |
|----------------------|--------------------------------------------|--------|-------|
| TAGLN;<br>Transgelin | Shape-change sensitive actin               | −5.957 | 2.39  |
| FN; Fibronectin      | Integrin associated glycoprotein           | 4.5    | 0     |
| SNAIL                | EMT/EndoMT associated transcription factor | 0      | 4.8   |
| BMP6                 | TGF $\beta$ superfamily signalling         | 0      | 2.38  |
| HAS2;                | Pro-migratory                              | 2.497  | 2.18  |
| RBPJ                 | NOTCH1 associated protein                  | 0      | 1.6   |
| NFATc1               | Immune response transcription factor       | 1.6    | −1.87 |
| NFATc2               | Immune response transcription factor       | 0      | −2.13 |
| PECAM-1;<br>(CD31)   | Endothelial cell-cell junction protein     | −3.998 | 0     |

## References

1. Lu, C.C.; Liu, M.M.; Culshaw, G.; Clinton, M.; Argyle, D.J.; Corcoran, B.M. Gene network and canonical pathway analysis in canine myxomatous mitral valve disease: a microarray study. *Vet. J.* **2015**, *204*, 23–31.
2. Thalji, N.M.; Hagler, M.A.; Zhang, H.; Casacang-Verzosa, G.; Nair, A.A.; Suri, R.M.; Miller, J.D. Nonbiased Molecular Screening Identifies Novel Molecular Regulators of Fibrogenic and Proliferative Signaling in Myxomatous Mitral Valve Disease. *Circ. Cardiovasc. Genet.* **2015**, *8*, 516–528.

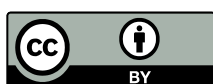

© 2017 by the authors; licensee MDPI, Basel, Switzerland. This article is an open access article distributed under the terms and conditions of the Creative Commons by Attribution (CC-BY) license (<http://creativecommons.org/licenses/by/4.0/>).
